# Supplementary material
Source: publisher figshare collection journal article supplement (https://karger.figshare.com/ndownloader/files/26347009)
Supplement: Supplementary file 1 [file 26347009]

Supplemental Material/Videos

Video 1: Demonstration of APC application in non-contact fashion

Video 2: Demonstration of APC application in contact fashion
